# Supplementary material for: Fluorescence quenching between unbonded graphene quantum dots and gold nanoparticles upon simple mixing
Source: Royal Society of Chemistry journal article supplement (doi:10.1039/c4ra06408a), 2014-01-01
Supplement: c4ra06408a1.pdf [file c4ra06408a1.pdf]

## Supporting Information

### **Fluorescence quenching between unbonded graphene quantum dots and gold nanoparticles upon simple mixing**

Yi Liu,<sup>a</sup> Wei Quan Loh,<sup>a</sup> Arundithi Ananthanarayanan,<sup>a</sup> Cheng Yang,<sup>b</sup> Peng Chen,<sup>a</sup>  
Chenjie Xu<sup>\*a</sup>

<sup>a</sup> Division of Bioengineering, School of Chemical and Biomedical Engineering, Nanyang Technological University, 70 Nanyang Drive, Singapore 637457

<sup>b</sup> Division of Energy & Environment, Graduate School at Shenzhen, Tsinghua University, 2279 Li Shui Road, Shenzhen, Guangdong Province, P. R. China

\*Correspondence should be addressed to: [cjxu@ntu.edu.sg](mailto:cjxu@ntu.edu.sg)

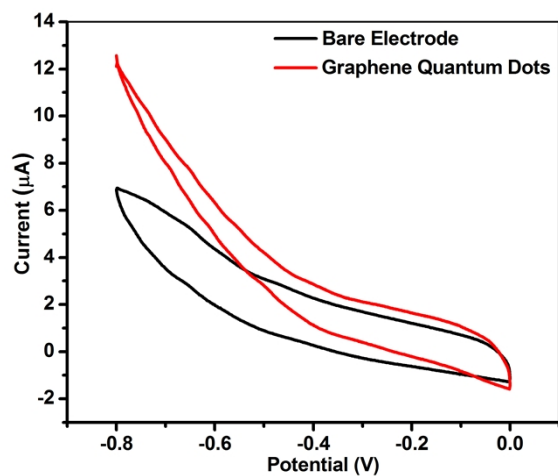

Figure S1: Cyclic voltammetry of bare glassy carbon electrode (GCE) and GQDs modified GCE in 0.1M PBS (pH5)

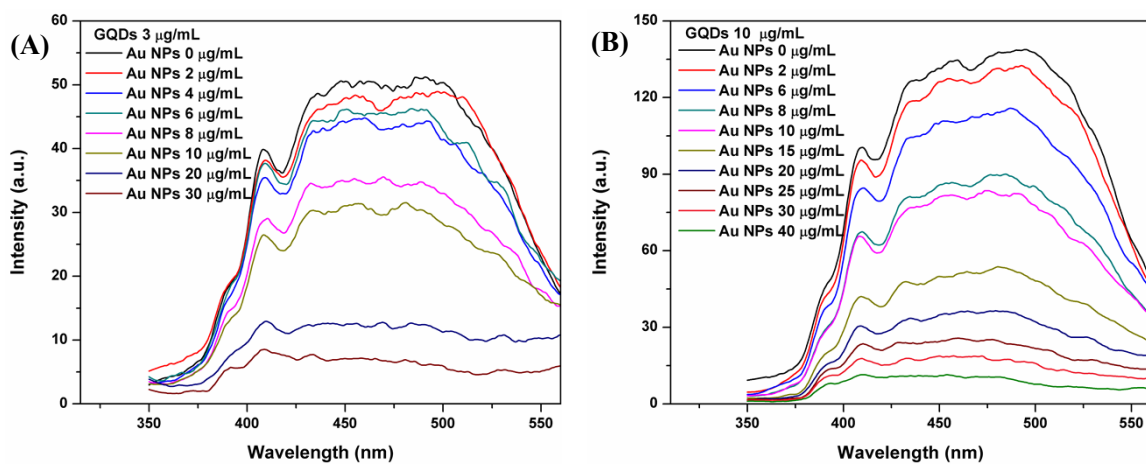

Figure S2: (A) Fluorescence spectra of GQDs and Au NPs mixtures with a constant 3 µg/mL GQDs and varied concentrations of Au NPs; (B) Fluorescence spectra of GQDs and Au NPs mixtures with a constant 10 µg/mL GQDs and varied concentrations of Au NPs.

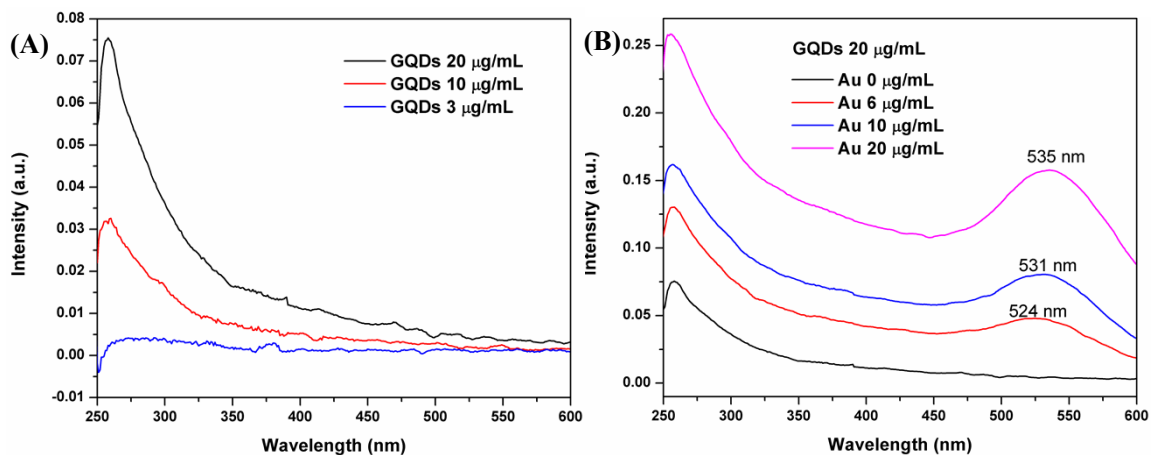

Figure S3: (A) UV-vis absorption spectra of GQDs (20, 10 and 3 µg/mL), the intensity decreases as the GQD concentration decreases; (B) UV-vis absorption spectra of mixtures with 20 µg/mL GQDs and varied concentrations of Au NPs (0, 6, 10, 20 µg/mL).

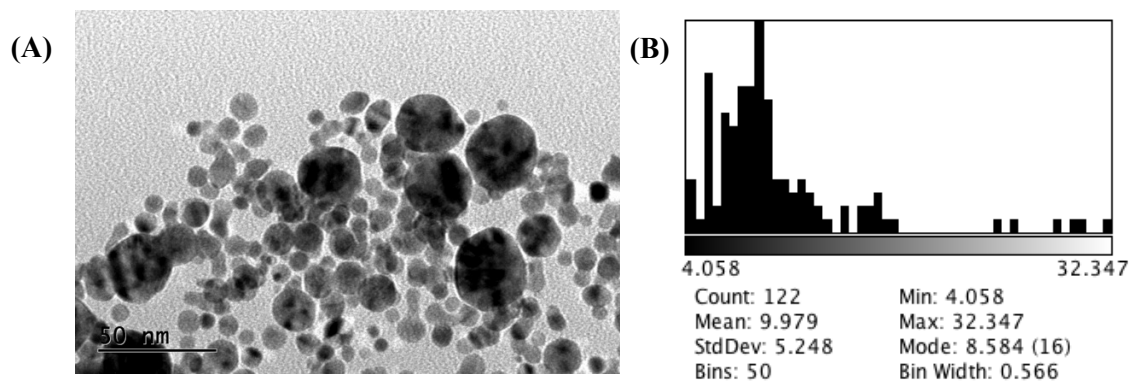

Figure S4: (A) TEM image of the mixture with 20 µg/mL GQDs and 10 µg/mL Au NPs; (B) particle size distribution of the Au NPs measured from the TEM image.
